## Correction

# Correction: Population Genetics of the São Tomé Caecilian (Gymnophiona: Dermophiidae: *Schistometopum thomense*) Reveals Strong Geographic Structuring

## The PLOS ONE Staff

The parameter name in the Materials and Methods section and Results section are incorrectly formatted. In all cases, the correct parameter name is  $F_s$ 's  $F_s$ .

The genetic variability measure in the Results section is incorrectly formatted. The correct genetic variability measure is  $F_{ST}$ .

The Figure 1 legend is incorrect. The word “Red” should be “Black” in the last sentence. The authors have provided a corrected version here.

---

**Citation:** The PLOS ONE Staff (2014) Correction: Population Genetics of the São Tomé Caecilian (Gymnophiona: Dermophiidae: *Schistometopum thomense*) Reveals Strong Geographic Structuring. PLoS ONE 9(12): e116005. doi:10.1371/journal.pone.0116005

**Published:** December 15, 2014

**Copyright:** © 2014 The PLOS ONE Staff. This is an open-access article distributed under the terms of the Creative Commons Attribution License, which permits unrestricted use, distribution, and reproduction in any medium, provided the original author and source are credited.

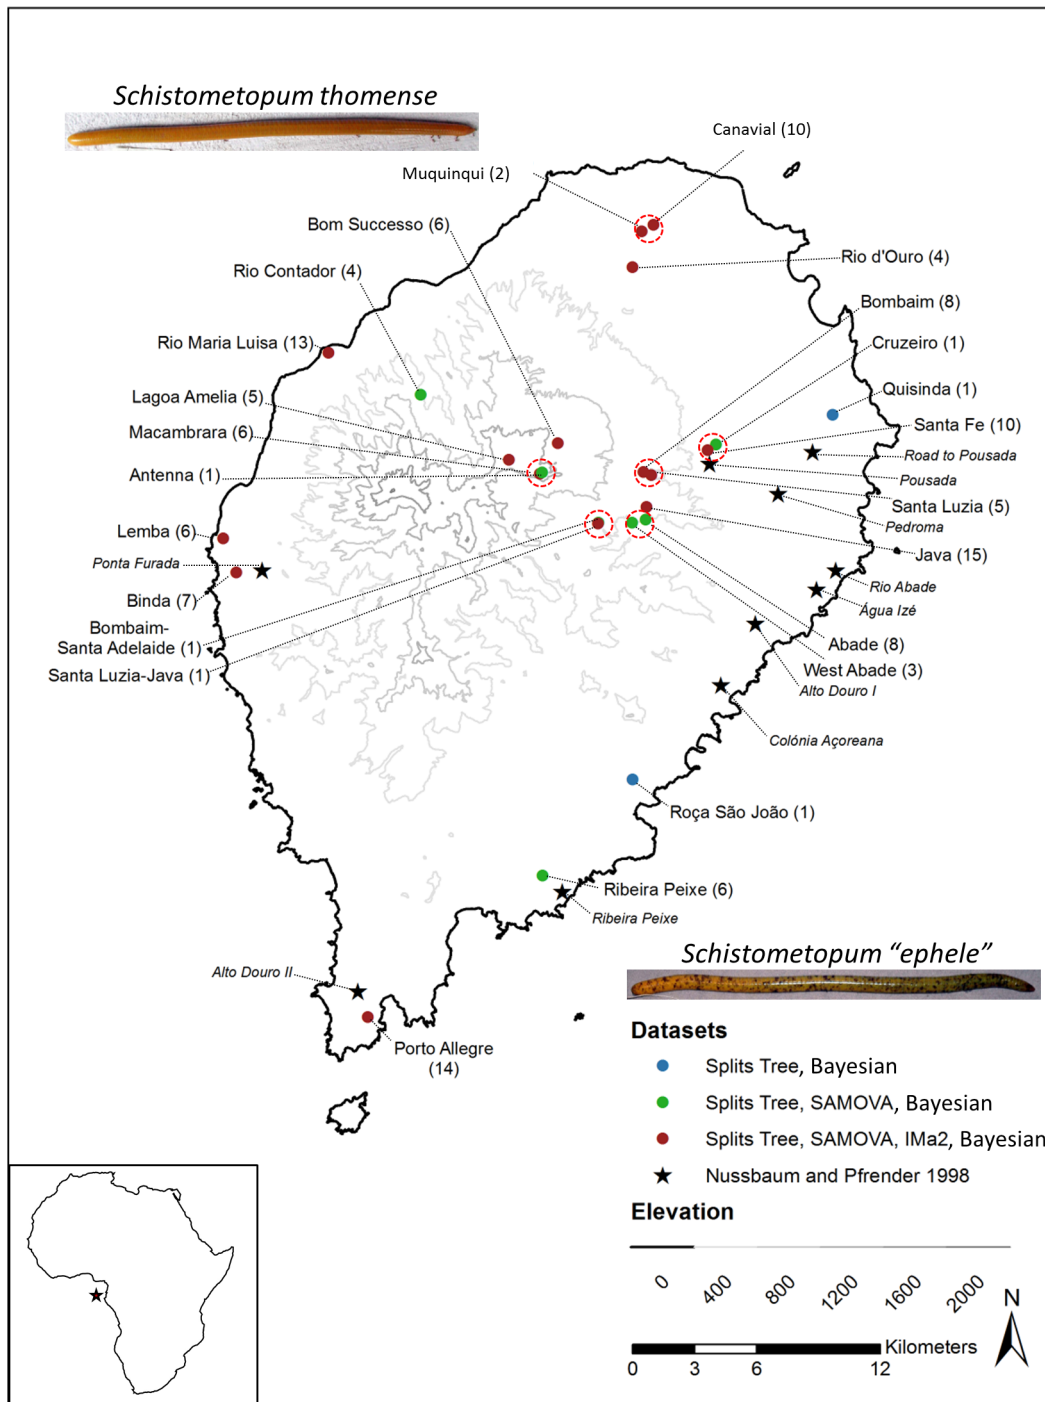

**Figure 1. *Schistometopum thomense* collection localities, São Tomé, Republic of São Tomé and Príncipe.** Numbers in parentheses indicate number of specimens available for genetic analyses. Legend indicates specimens used in Splits Tree, Bayesian, SAMOVA, and/or IMA2 analyses, or discussed by Nussbaum and Pfreder [36] in morphological comparisons. Dashed, red ovals indicate populations lumped for SAMOVA analyses. Photographs show examples of clear and flecked morphs as *Schistometopum thomense* and *Schistometopum "epehele"*, respectively. Red star in lower left panel indicates relative position of São Tomé to continental Africa.  
 doi:10.1371/journal.pone.0104628.g001

## Reference

1. Stoelting RE, Measey GJ, Drewes RC (2014) Population Genetics of the São Tomé Caecilian (Gymnophiona: Dermophiidae: *Schistometopum thomense*) Reveals Strong Geographic Structuring. PLoS ONE 9(8): e104628. doi:10.1371/journal.pone.0104628
